# Supplementary material for: Modelling Co-Infection of the Cystic Fibrosis Lung by Pseudomonas aeruginosa and Burkholderia cenocepacia Reveals Influences on Biofilm Formation and Host Response
Source: PLoS One. 2012 Dec 21;7(12):e52330. doi: 10.1371/journal.pone.0052330 (PMC3528780; doi:10.1371/journal.pone.0052330)
Supplement: Table S1 — Colonization of murine lung with clinical and environmental P. aeruginosa and B. cenocepacia strains. (DOCX) [file pone.0052330.s006.docx]

**Table S1. Colonization of murine lung with clinical and environmental *P. aeruginosa* and *B. cenocepacia* strains.**

| **Mouse strain** | **Bacterial strain** | **No of micea** | **Mortality %**  **(No of dead/total mice) b** | **Chronic infection %**  **(No of infected/**  **surviving mice)c** | | **% of co-infected mice by single speciesd** | **Total CFU/lung of surviving mice (strain)** |
| --- | --- | --- | --- | --- | --- | --- | --- |
| **C57Bl/6NCrlBR** | | | | | | | |
|  | **RP73** | 17 | 5.88 (1/17) | 68.75 (11/16) |  | | 5.2x104 |
|  | **Co-infection** | 22 | 0 (0/22) | 77.27 (17/22) | 100 (17/17) (RP73)  0 (0/17) (LMG16656) | | 4.2x104 (RP73)  0 (LMG16656) |
|  | **LMG16656** | 15 | 0 (0/15) | 73.33 (11/15) |  | | 7.9x103 |
|  | **E5** | 20 | 24 (6/25) | 36.84 (7/19) |  | | 2.6x104 |
|  | **Co-infection** | 25 | 15 (3/20) | 58.82 (10/17) | 100 (10/10) (E5)  0 (0/10) (Mex1) | | 5.4x103 (E5)  0 (Mex1) |
|  | **Mex1** | 16 | 0 (0/16) | 43.75 (7/16) |  | | 4.8x104 |
| **B6.129P2-*Cftrtm1UNCTgN(FABPCFTR) Cftr*+/+** | | | | | | | |
|  | **RP73** | 11 | 18.18 (2/11) | 88.88 (8/9) |  | | 1.5x104 |
|  | **Co-infection** | 19 | 26.31 (5/19) # | 64.28 (9/14) | 100 (9/9) (RP73)  11.11 (1/9) (LMG16656) | | 7.9x104 (RP73) 1.2x107(LMG16656) |
|  | **LMG16656** | 14 | 14.28 (2/14) | 100 (12/12) |  | | 2.2x105 |
| **B6.129P2-*Cftrtm1UNCTgN(FABPCFTR)CftrS489X/S489X*** | | | | | | | |
|  | **RP73** | 10 | 20 (2/10) | 75 (6/8) |  | | 2.4x105 |
|  | **Co-infection** | 15 | 26.66 (4/15) # | 81.81 (9/11) | 100 (9/9) (RP73)  11.11 (1/9) (LMG16656) | | 4x104 (RP73) 8.4x104(LMG16656) |
|  | **LMG16656** | 11 | 18.8 (2/11) | 88.88 (8/9) |  | | 6.65x104 |

a Pooled mice, analysed in two to three independent experiments.

b Mortality 14 days after challenge expressed as median values. #Significant difference of C57Bl/6NCrlBR *vs* B6.129P2-*Cftrtm1UNCTgN(FABPCFTR) Cftr*+/+ and B6.129P2-*Cftrtm1UNCTgN(FABPCFTR)CftrS489X/S489X* (# *P*<0.05). Chi-square test (two-tailed).

c Infected mice, surviving 14 days after challenge. Data represent median values of infected mice, surviving 14 days after challenge.

d For co-infection experiments data indicate the percentage of infected mice by *P. aeruginosa* or *B. cenocepacia*. In parenthesis, the number of infected mice by single species or co-infected mice.
